# Supplementary material for: Assessing the detection potential of targeting satellites for global greenhouse gas monitoring: insights from TANGO orbit simulations
Source: Copernicus journal article supplement (doi:10.5194/amt-18-5247-2025), 2025-10-10
Supplement: Supplementary file [file amt-18-5247-2025-supplement-title-page.pdf › amt-18-5247-2025-supplement-title-page.pdf]

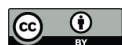

## *Supplement of*

# **Assessing the detection potential of targeting satellites for global greenhouse gas monitoring: insights from TANGO orbit simulations**

**Harikrishnan Charuvil Asokan et al.**

*Correspondence to:* Harikrishnan Charuvil Asokan ([hari@uni-heidelberg.de](mailto:hari@uni-heidelberg.de))

- [amt-18-5247-2025-supplement-title-page.pdf](#)
- Supplementary Material
  - [Selected\\_targets\\_Fig5](#)
    - \* [Readme.txt](#)
    - \* [Supplement\\_Clearsky\\_2022-03-22\\_priority\\_CO2.nc](#)
    - \* [Supplement\\_Cloud-Filtered\\_2022-03-22\\_priority\\_CO2.nc](#)
    - \* [Supplement\\_Cloud\\_Forecast\\_2022-03-22\\_priority\\_CO2.nc](#)
  - [Supplementary Material.pdf](#)

The copyright of individual parts of the supplement might differ from the article licence.
